# Supplementary material for: Translating GWAS Findings to Inform Drug Repositioning Strategies for COVID-19 Treatment
Source: Research Square preprint supplement (doi:10.21203/rs.3.rs-3443080/v1), 2023-10-19
Supplement: Supplementary file 1 [file 46d4ea00913fae88832b063c.docx]

# Supplemental information

# Translating GWAS Findings to Inform Drug Repositioning Strategies for COVID-19 Treatment

Ming-Ju Tsai1,2, Sohyun Jeong1,2, Fangtang Yu,1,2, Ting-Fu Chen3, Peng-Hsuan Li3, Hsueh-Fen Juan3,4, Jia-Hsin Huang3, and *Yi-Hsiang Hsu1,2,5

1Hinda and Arthur Marcus Institute for Aging Research, Hebrew SeniorLife, Boston, 02131, MA

2Department of Medicine, Beth Israel Deaconess Medical Center and Harvard Medical School, Boston, MA

3Taiwan AI Labs, Taipei 10351, Taiwan

4Department of Life Science, Center for Computational and Systems Biology, National Taiwan University, Taipei 10617, Taiwan

5Broad Institute of MIT and Harvard, Cambridge, MA

*Corresponding author: Email address: [yihsianghsu@hsl.harvard.edu](mailto:yihsianghsu@hsl.harvard.edu)

# Five methods to prioritize target genes in GWAS loci

## TWAS

TWAS is a method that combines transcriptome gene expression data with genetic data from GWAS to identify gene-based associations for complex traits1. We used S-PrediXcan2 to perform TWAS analysis in 49 tissues from GTEx v8, including the primary causal tissues for COVID-19 (lung and whole blood). S-MultiXcan leverages shared eQTLs across tissues and contexts to improve the ability to identify potential target genes3. Genes with TWAS p-value below the Bonferroni-corrected cutoff (0.05/total number of tests) were selected as prioritizing genes.

## PoPS

PoPS is a similarity-based gene prioritization method that uses GWAS summary statistics and incorporates data from publicly available RNA-seq datasets, curated pathways, and predicted protein-protein interactions4. We utilized the PoPS results from COVID-19 HGI to select prioritized genes.

## ABC Model

GWAS has identified thousands of non-coding causal variants that may affect enhancers. 3D chromatin interactions can map enhances and their target genes. The ABC model recently developed to predict enhancer-promoter connections with CRISPR perturbation validation5, created enhancer-gene maps in 131 human cell types and tissues6. To identify prioritized genes, we mapped the fine-mapping variants from the six COVID-19 HGI cohorts into the 131 cell-types enhancer-gene map6. We checked if causal variants were found in the enhancer region with an ABC score greater than 0.02.

## COGS

Capture Hi-C Omnibus Gene Score (COGS) is a gene prioritization strategy that uses 3D chromosomal interactions to rank potential disease-associated genes and tissues in 17 human primary blood cell types7. We downloaded the COGS results from COVID-19 HGI and selected the putative target genes with COGS prioritization above the cutoff of 0.3.

## PPI

Gordon et al. identified 332 high-confidence protein-protein interactions (PPIs) between SARS-CoV-2 and human proteins8. We integrated the 332 PPIs with the proteins from the nearest genes in each GWAS locus. We used the Molecular Interaction Search Tool (MIST)9 to identify the PPIs between the nearest genes from each GWAS locus and the 332 high-confidence PPIs identified by Gordon et al. MIST is a comprehensive resource on molecular interactions and infers interactions using other supporting evidence and similar genes through correlation analysis. The results of PPIs between 42 prioritized genes and 332 Viral-Host PPIs are shown in Supplementary Table 2.

# DockCoV2

## Visualization for docking results in DockCoV2

The docking results were further processed to build a protein heatmap corresponding to the affinity score with the ligand docking positions. Next, we applied the NGL viewer tool10 to demonstrate the protein heatmap of drug-protein docking results interactively in the DockCoV2 database (https://dockcov2.org/drugs/). Five search spaces are displayed to provide sophisticated visualization of the potential docking poses.

## Literature mining in DockCoV2

To mine relations between drugs and genes in the literature related to COVID-19, we processed about 160 thousand PMC-OA full-text articles collected by COVID-19 Open Research Dataset (CORD-19)11. We downloaded the dataset version on 31 May 2021 to extract all variations and their associated entities (i.e., gene, disease, and chemical). Herein, we used the pre-trained BioBERT model from the pubmedKB12 to annotate biomedical entities and then used GNormPlus13 and tmChem14 to normalize gene, disease, and drug entities, respectively. Finally, we extracted the sentences containing given entity pairs based on co-occurrence and returned the PubMed Unique Identifier (PMID) results for further reading.

# Reference

1. Gamazon ER, Wheeler HE, Shah KP, et al. A gene-based association method for mapping traits using reference transcriptome data. *Nat Genet*. Sep 2015;47(9):1091-8. doi:10.1038/ng.3367

2. Barbeira AN, Dickinson SP, Bonazzola R, et al. Exploring the phenotypic consequences of tissue specific gene expression variation inferred from GWAS summary statistics. *Nature communications*. 05 2018;9(1):1825. doi:10.1038/s41467-018-03621-1

3. Barbeira AN, Pividori M, Zheng J, Wheeler HE, Nicolae DL, Im HK. Integrating predicted transcriptome from multiple tissues improves association detection. *PLoS genetics*. 01 2019;15(1):e1007889. doi:10.1371/journal.pgen.1007889

4. Weeks EM, Ulirsch JC, Cheng NY, et al. Leveraging polygenic enrichments of gene features to predict genes underlying complex traits and diseases. *Nat Genet*. Aug 2023;55(8):1267-1276. doi:10.1038/s41588-023-01443-6

5. Fulco CP, Nasser J, Jones TR, et al. Activity-by-contact model of enhancer-promoter regulation from thousands of CRISPR perturbations. *Nature genetics*. 12 2019;51(12):1664-1669. doi:10.1038/s41588-019-0538-0

6. Nasser J, Bergman DT, Fulco CP, et al. Genome-wide enhancer maps link risk variants to disease genes. *Nature*. Apr 2021;doi:10.1038/s41586-021-03446-x

7. Javierre BM, Burren OS, Wilder SP, et al. Lineage-Specific Genome Architecture Links Enhancers and Non-coding Disease Variants to Target Gene Promoters. *Cell*. 11 2016;167(5):1369-1384.e19. doi:10.1016/j.cell.2016.09.037

8. Gordon DE, Jang GM, Bouhaddou M, et al. A SARS-CoV-2 protein interaction map reveals targets for drug repurposing. *Nature*. 07 2020;583(7816):459-468. doi:10.1038/s41586-020-2286-9

9. Hu Y, Vinayagam A, Nand A, et al. Molecular Interaction Search Tool (MIST): an integrated resource for mining gene and protein interaction data. *Nucleic acids research*. 01 04 2018;46(D1):D567-D574. doi:10.1093/nar/gkx1116

10. Rose AS, Hildebrand PW. NGL Viewer: a web application for molecular visualization. *Nucleic Acids Res*. Jul 01 2015;43(W1):W576-9. doi:10.1093/nar/gkv402

11. Lu Wang L, Lo K, Chandrasekhar Y, et al. CORD-19: The Covid-19 Open Research Dataset. *ArXiv*. Apr 22 2020;

12. Li PH, Chen TF, Yu JY, et al. pubmedKB: an interactive web server for exploring biomedical entity relations in the biomedical literature. *Nucleic Acids Res*. May 10 2022;50(W1):W616-22. doi:10.1093/nar/gkac310

13. Wei CH, Kao HY, Lu Z. GNormPlus: An Integrative Approach for Tagging Genes, Gene Families, and Protein Domains. *Biomed Res Int*. 2015;2015:918710. doi:10.1155/2015/918710

14. Leaman R, Wei CH, Lu Z. tmChem: a high performance approach for chemical named entity recognition and normalization. *J Cheminform*. 2015;7(Suppl 1 Text mining for chemistry and the CHEMDNER track):S3. doi:10.1186/1758-2946-7-S1-S3
