# Supplementary material for: Translating GWAS Findings to Inform Drug Repositioning Strategies for COVID-19 Treatment
Source: Research Square preprint supplement (doi:10.21203/rs.3.rs-3443080/v1), 2023-10-19
Supplement: Supplementary file 2 [file 5c73ec80d778925e9f67355b.pdf]

**Supplementary Table 1. 17 Prioritized genes located in GWAS suggestive loci (p-value < 1 x 10<sup>-6</sup>)**

| Cytoband | Lead SNP    | Target gene | Types of gene prioritization methods |      | Phenotypes of COVID-19 |      |
|----------|-------------|-------------|--------------------------------------|------|------------------------|------|
|          |             |             | TWAS                                 | POPS | TWAS                   | POPS |
| 1p13.2   | rs7535387   | TRIM33      |                                      |      | V                      | V    |
| 6p21.32  | rs9501257   | HLA-DPB1    |                                      |      | V                      | V    |
| 10q24.1  | rs117098321 | SORBS1      |                                      |      | V                      | V    |
| 1p13.1   | rs188398686 | VANGL1      |                                      | V    |                        | V    |
| 17p13.1  | rs149399480 | GAS7        | V                                    |      |                        | V    |
| 6p24.3   | rs2299036   | DSP         |                                      |      | V                      | V    |
| 11q23.3  | rs75256341  | GRIK4       |                                      | V    |                        | V    |
| 22q11.21 | rs150868259 | CLDN5       |                                      |      | V                      | V    |
| 5q13.2   | rs139478596 | ZNF366      |                                      |      | V                      | V    |
| 8q23.1   | rs189378134 | TRHR        |                                      |      | V                      | V    |
| 4q21.1   | rs185675098 | G3BP2       |                                      | V    | V                      | V    |
| 6p21.1   | rs9462875   | CUL9        |                                      |      | V                      | V    |
| 1q21.1   | rs28381173  | FMO5        |                                      | V    |                        | V    |
| 21q22.12 | rs77619227  | RUNX1       |                                      | V    | V                      | V    |
| 4q35.1   | rs72691535  | ING2        |                                      |      | V                      | V    |
| 5q34     | rs75309214  | MAT2B       |                                      |      | V                      | V    |

**Supplementary Table 2. Protein-Protein Interactions between 42 prioritized genes and 332 Viral-Host PPIs**

| <b>Protein has PPI indirectly with viral protein</b> | <b>Protein has PPI directly with viral protein</b> | <b>SARS-CoV-2 proteins</b> |
|------------------------------------------------------|----------------------------------------------------|----------------------------|
|                                                      | TLE1*                                              | nsp13                      |
| TLE1*                                                | GOLGA2                                             | nsp13                      |
|                                                      | TLE3                                               | nsp13                      |
|                                                      | TLE5                                               | nsp13                      |
|                                                      | FYCO1*                                             | nsp13                      |
| XCR1*                                                | PLEKHF2                                            | Orf8                       |
| CCHCR1*                                              | GOLGA2                                             | nsp13                      |
|                                                      | GRIPAP1                                            | nsp13                      |
|                                                      | HSBP1                                              | nsp13                      |
|                                                      | NINL                                               | nsp13                      |
|                                                      | NUP54                                              | nsp9                       |
|                                                      | NUP62                                              | nsp9                       |
|                                                      | PKP2                                               | nsp1                       |
|                                                      | RBM41                                              | nsp12                      |
| IGF1*                                                | IDE                                                | nsp4                       |
| DPP9*                                                | CSNK2A2                                            | N                          |
|                                                      | TRMT1                                              | nsp5(C145A)                |
| HDGFL2*                                              | CSNK2A2                                            | N                          |
| OAS3*                                                | EXOSC3                                             | nsp8                       |
|                                                      | G3BP2                                              | N                          |
|                                                      | PABPC4                                             | N                          |
| OAS1*                                                | GOLGA2                                             | nsp13                      |
| IFNAR1*                                              | AP2M1                                              | nsp10                      |
|                                                      | PRKACA                                             | nsp13                      |
| LZTFL1*                                              | CEP250                                             | nsp13                      |
|                                                      | SEPSECS                                            | nsp8                       |
| TCF19*                                               | GOLGA2                                             | nsp13                      |

**Supplementary Table 3. Gene Set Enrichment Analysis with WikiPathways Human**

| Term                                                                              | Category          | P-value  | Adjusted P-value | Odds Ratio | Combined Score | Genes                             |
|-----------------------------------------------------------------------------------|-------------------|----------|------------------|------------|----------------|-----------------------------------|
| Type I interferon induction and signaling during SARS-CoV-2 infection<br>WP4868   | antiviral         | 4.18E-11 | 2.51E-09         | 132.89     | 3175.66        | IFNAR2;OAS1;OAS2;OAS3;TYK2;IFNAR1 |
| Host-pathogen interaction of human coronaviruses - interferon induction<br>WP4880 | antiviral         | 6.27E-11 | 2.51E-09         | 123.030864 | 2890.27593     | IFNAR2;OAS1;OAS2;OAS3;TYK2;IFNAR1 |
| Immune response to tuberculosis<br>WP4197                                         | antibacteria      | 1.44E-07 | 3.85E-06         | 110.465374 | 1739.85736     | IFNAR2;OAS1;TYK2;IFNAR1           |
| Type III interferon signaling<br>WP2113                                           | immunosuppressant | 1.92E-04 | 1.98E-03         | 124.6875   | 1067.29086     | IL10RB;TYK2                       |
| Overview of interferons-mediated signaling pathway<br>WP4558                      | immunosuppressant | 1.05E-06 | 2.11E-05         | 63.5566188 | 874.676203     | IFNAR2;IL10RB;TYK2;IFNAR1         |

|                                             |           |          |          |            |            |                    |
|---------------------------------------------|-----------|----------|----------|------------|------------|--------------------|
| SARS coronavirus and innate immunity WP4912 | antiviral | 3.72E-05 | 4.95E-04 | 54.7527473 | 558.504028 | IFNAR2;TYK2;IFNAR1 |
|---------------------------------------------|-----------|----------|----------|------------|------------|--------------------|

**Supplementary Table 4. Gene Set Enrichment Analysis with Elsevier Pathway Collection**

| Term                                                                            | Category                            | P-value  | Adjusted P-value | Odds Ratio | Combined Score | Genes              |
|---------------------------------------------------------------------------------|-------------------------------------|----------|------------------|------------|----------------|--------------------|
| IL22R -> STAT3 Signaling                                                        | immunosuppressant                   | 6.42E-05 | 4.88E-03         | 249.43     | 2407.70        | IL10RB;TYK2        |
| IL10R -> STAT Signaling                                                         | immunosuppressant                   | 1.20E-04 | 4.88E-03         | 166.27     | 1501.64        | IL10RB;TYK2        |
| SOCS in Negative Feedback Regulation in Myocarditis                             | anti-inflammatory immunosuppressant | 8.15E-06 | 2.00E-03         | 95.875     | 1123.40605     | IFNAR2;TYK2;IFNAR1 |
| STAT3 Facilitates the Function of Treg Cells and Cancer Progression             | antineoplastic                      | 3.31E-04 | 7.01E-03         | 90.6681818 | 726.585254     | IL10RB;TYK2        |
| STAT3 Inhibits Maturation of Dendritic Cells and Facilitates Cancer Progression | antineoplastic                      | 5.07E-04 | 9.56E-03         | 71.2285714 | 540.402969     | IL10RB;TYK2        |

**Supplementary Table 5. Gene Set Enrichment Analysis with GO Molecular Function**

| Term                                            | Category                                            | P-value  | Adjusted P-value | Odds Ratio | Combined Score | Genes           |
|-------------------------------------------------|-----------------------------------------------------|----------|------------------|------------|----------------|-----------------|
| interferon receptor activity<br>(GO:0004904)    | immunosuppressant                                   | 4.29E-05 | 4.59E-04         | 332.58     | 3344.84        | IFNAR2;IFNAR1   |
| adenylyltransferase activity<br>(GO:0070566)    | other                                               | 1.29E-05 | 3.17E-04         | 80.72      | 908.84         | OAS1;OAS2;OAS3  |
| C-C chemokine receptor activity<br>(GO:0016493) | anti-inflammatory                                   | 1.48E-05 | 3.17E-04         | 76.68      | 852.75         | XCR1;CCR9;CXCR6 |
| C-C chemokine binding<br>(GO:0019957)           | anti-inflammatory                                   | 1.69E-05 | 3.17E-04         | 73.03      | 802.46         | XCR1;CCR9;CXCR6 |
| chemokine receptor activity<br>(GO:0004950)     | anti-inflammatory<br>immunosuppressant<br>antiviral | 2.16E-05 | 3.25E-04         | 66.67      | 716.10         | XCR1;CCR9;CXCR6 |

**Supplementary Table 6. Gene Set Enrichment Analysis with GO Biological Process**

| Term                                                | Category          | P-value  | Adjusted P-value | Odds Ratio | Combined Score | Genes          |
|-----------------------------------------------------|-------------------|----------|------------------|------------|----------------|----------------|
| regulation of ribonuclease activity<br>(GO:0060700) | antineoplastic    | 8.59E-08 | 1.53E-05         | 767.54     | 12488.3576     | OAS1;OAS2;OAS3 |
| regulation of nuclease activity<br>(GO:0032069)     | antineoplastic    | 1.71E-07 | 2.29E-05         | 511.67     | 7971.23775     | OAS1;OAS2;OAS3 |
| interleukin-27-mediated signaling                   | immunosuppressant | 3.85E-06 | 4.12E-04         | 127.86     | 1594.08542     | OAS1;OAS2;TYK2 |

|                                                                                              |                   |          |          |        |            |                                   |
|----------------------------------------------------------------------------------------------|-------------------|----------|----------|--------|------------|-----------------------------------|
| pathway<br>(GO:0070106)                                                                      |                   |          |          |        |            |                                   |
| positive regulation<br>of monocyte<br>chemotactic<br>protein-1<br>production<br>(GO:0071639) | anti-inflammatory | 1.20E-04 | 5.40E-03 | 166.27 | 1501.641   | OAS1;OAS3                         |
| cellular response<br>to type I<br>interferon<br>(GO:0071357)                                 | immunosuppressant | 4.45E-09 | 1.19E-06 | 56.21  | 1080.9438  | IFNAR2;OAS1;OAS2;OAS3;TYK2;IFNAR1 |
| type I interferon<br>signaling pathway<br>(GO:0060337)                                       | immunosuppressant | 4.45E-09 | 1.19E-06 | 56.21  | 1080.9438  | IFNAR2;OAS1;OAS2;OAS3;TYK2;IFNAR1 |
| positive regulation<br>of cellular<br>respiration<br>(GO:1901857)                            | other             | 2.34E-04 | 6.95E-03 | 110.83 | 926.563103 | IL10RB;IFNAR1                     |
| regulation of<br>monocyte<br>chemotactic<br>protein-1<br>production<br>(GO:0071637)          | immunosuppressant | 2.34E-04 | 6.95E-03 | 110.83 | 926.563103 | OAS1;OAS3                         |
| regulation of<br>chemokine (C-X-C<br>motif) ligand 2<br>production<br>(GO:2000341)           | immunosuppressant | 3.31E-04 | 9.19E-03 | 90.67  | 726.585254 | OAS1;OAS3                         |

|                                                                         |                   |          |          |       |            |                  |
|-------------------------------------------------------------------------|-------------------|----------|----------|-------|------------|------------------|
| positive regulation of glycogen biosynthetic process (GO:0045725)       | other             | 3.86E-04 | 9.38E-03 | 83.11 | 653.30253  | IGF1;SORBS1      |
| positive regulation of glycogen metabolic process (GO:0070875)          | other             | 4.44E-04 | 9.51E-03 | 76.71 | 592.142891 | IGF1;SORBS1      |
| regulation of type I interferon-mediated signaling pathway (GO:0060338) | immunosuppressant | 3.36E-05 | 2.56E-03 | 56.78 | 584.915066 | IFNAR2;OAS1;OAS3 |

**Supplementary Table 7. Functional Characterization on druggable targets**

| Gene    | Differentially expressed Gene                                                                                                        | TOP10 Enriched Pathways | TOP10 Enriched Gene Ontology                                                                                                                                                                                    | Meet functional requirement (Number of condition) |
|---------|--------------------------------------------------------------------------------------------------------------------------------------|-------------------------|-----------------------------------------------------------------------------------------------------------------------------------------------------------------------------------------------------------------|---------------------------------------------------|
| SLC6A20 | Transcriptional and proteomic insights into the host response in fatal COVID-19 cases(PMID:33082228)                                 | NA                      | NA                                                                                                                                                                                                              | No (1)                                            |
| CCR9    | <ol style="list-style-type: none"> <li>1. TWAS Whole blood (FDR:9.68E-07)</li> <li>2. Mock v SARS-CoV-2 Lung GSE150847 up</li> </ol> | NA                      | <ol style="list-style-type: none"> <li>1. C-C chemokine receptor activity (GO:0016493)</li> <li>2. C-C chemokine receptor activity (GO:0016493)</li> <li>3. chemokine receptor activity (GO:0004950)</li> </ol> | Yes (2)                                           |
| CXCR6   | TWAS Lung (FDR:2.23E-13)                                                                                                             | NA                      | <ol style="list-style-type: none"> <li>1. C-C chemokine receptor activity (GO:0016493)</li> <li>2. C-C chemokine binding (GO:0019957)</li> <li>3. chemokine receptor activity (GO:0004950)</li> </ol>           | Yes (2)                                           |
| XCR1    | Transcriptional and proteomic insights into the host response in fatal COVID-19 cases(PMID:33082228)                                 | NA                      | <ol style="list-style-type: none"> <li>1. C-C chemokine receptor activity (GO:0016493)</li> <li>2. C-C chemokine binding (GO:0019957)</li> <li>3. chemokine receptor activity (GO:0004950)</li> </ol>           | Yes (2)                                           |

|        |                                                                                                                                                                                           |                                                                                                                                                                                                                                                                                                                                                                                                                            |                                                                                                                                                                                                   |         |
|--------|-------------------------------------------------------------------------------------------------------------------------------------------------------------------------------------------|----------------------------------------------------------------------------------------------------------------------------------------------------------------------------------------------------------------------------------------------------------------------------------------------------------------------------------------------------------------------------------------------------------------------------|---------------------------------------------------------------------------------------------------------------------------------------------------------------------------------------------------|---------|
| IGF1   | NA                                                                                                                                                                                        | NA                                                                                                                                                                                                                                                                                                                                                                                                                         | <ol style="list-style-type: none"> <li>1. positive regulation of glycogen biosynthetic process (GO:0045725)</li> <li>2. positive regulation of glycogen metabolic process (GO:0070875)</li> </ol> | No (1)  |
| IL10RB | <ol style="list-style-type: none"> <li>1. Mock v SARS-CoV-2 24h liver-organoid GSE151803 up</li> <li>2. Untreated v SARS-CoV-2 IntestinalOrganoid 60h Expansion GSE149312 down</li> </ol> | <ol style="list-style-type: none"> <li>1. Type III interferon signaling WP2113</li> <li>2. Overview of interferons-mediated signaling pathway WP4558</li> <li>3. IL22R -&gt; STAT3 Signaling</li> <li>4. IL10R -&gt; STAT Signaling</li> <li>5. STAT3 Facilitates the Function of Treg Cells and Cancer Progression</li> <li>6. STAT3 Inhibits Maturation of Dendritic Cells and Facilitates Cancer Progression</li> </ol> | <ol style="list-style-type: none"> <li>1. positive regulation of cellular respiration (GO:1901857)</li> </ol>                                                                                     | Yes (3) |
| OAS1   | <ol style="list-style-type: none"> <li>1. Healthy v SARS-CoV-2 lung GSE147507 up</li> </ol>                                                                                               | <ol style="list-style-type: none"> <li>1. Type I interferon induction and signaling during SARS-</li> </ol>                                                                                                                                                                                                                                                                                                                | <ol style="list-style-type: none"> <li>1. adenylyltransferase activity (GO:0070566)</li> </ol>                                                                                                    | Yes (3) |

|  |                                                                                                                                                                                                                                                                                                                                                                                                                                                                                                                                                                                                                                                                                                                                                                                |                                                                                                                                                                                                                                                |                                                                                                                                                                                                                                                                                                                                                                                                                                                                                                                                                                                                                                                                                                                       |  |
|--|--------------------------------------------------------------------------------------------------------------------------------------------------------------------------------------------------------------------------------------------------------------------------------------------------------------------------------------------------------------------------------------------------------------------------------------------------------------------------------------------------------------------------------------------------------------------------------------------------------------------------------------------------------------------------------------------------------------------------------------------------------------------------------|------------------------------------------------------------------------------------------------------------------------------------------------------------------------------------------------------------------------------------------------|-----------------------------------------------------------------------------------------------------------------------------------------------------------------------------------------------------------------------------------------------------------------------------------------------------------------------------------------------------------------------------------------------------------------------------------------------------------------------------------------------------------------------------------------------------------------------------------------------------------------------------------------------------------------------------------------------------------------------|--|
|  | <ol style="list-style-type: none"> <li>2. Mock v SARS-CoV-2<br/>24h hiPSC-CMs<br/>GSE150392 up</li> <li>3. Mock v SARS-CoV-2<br/>A549 Series2<br/>GSE147507 up</li> <li>4. Mock v SARS-CoV-2<br/>Calu-3 24h totalRNA<br/>GSE148729 up</li> <li>5. Mock v SARS-CoV-2<br/>Calu-3 4h totalRNA<br/>GSE148729 down</li> <li>6. Mock v SARS-CoV-2<br/>Calu-3 s1 24h polyA<br/>GSE148729 up</li> <li>7. Mock v SARS-CoV-2<br/>Calu-3 s1 4h polyA<br/>GSE148729 down</li> <li>8. Mock v SARS-CoV-2<br/>Calu-3 s2 12h polyA<br/>GSE148729 up</li> <li>9. Mock v SARS-CoV-2<br/>Calu3 GSE147507 up</li> <li>10. Mock v SARS-CoV-2<br/>NHBE GSE147507 up</li> <li>11. SARS-CoV-2 Mock v<br/>DMSO Organoids<br/>GSE154613 up</li> <li>12. Untreated v SARS-<br/>CoV-2 Calu-3 4h</li> </ol> | <ol style="list-style-type: none"> <li>CoV-2 infection<br/>WP4868</li> <li>2. Host-pathogen<br/>interaction of human<br/>coronaviruses -<br/>interferon induction<br/>WP4880</li> <li>3. Immune response to<br/>tuberculosis WP4197</li> </ol> | <ol style="list-style-type: none"> <li>2. regulation of<br/>ribonuclease activity<br/>(GO:0060700)</li> <li>3. regulation of nuclease<br/>activity (GO:0032069)</li> <li>4. interleukin-27-<br/>mediated signaling<br/>pathway<br/>(GO:0070106)</li> <li>5. positive regulation of<br/>monocyte<br/>chemotactic protein-1<br/>production<br/>(GO:0071639)</li> <li>6. cellular response to<br/>type I interferon<br/>(GO:0071357)</li> <li>7. type I interferon<br/>signaling pathway<br/>(GO:0060337)</li> <li>8. regulation of<br/>monocyte<br/>chemotactic protein-1<br/>production<br/>(GO:0071637)</li> <li>9. regulation of<br/>chemokine (C-X-C<br/>motif) ligand 2<br/>production<br/>(GO:2000341)</li> </ol> |  |
|--|--------------------------------------------------------------------------------------------------------------------------------------------------------------------------------------------------------------------------------------------------------------------------------------------------------------------------------------------------------------------------------------------------------------------------------------------------------------------------------------------------------------------------------------------------------------------------------------------------------------------------------------------------------------------------------------------------------------------------------------------------------------------------------|------------------------------------------------------------------------------------------------------------------------------------------------------------------------------------------------------------------------------------------------|-----------------------------------------------------------------------------------------------------------------------------------------------------------------------------------------------------------------------------------------------------------------------------------------------------------------------------------------------------------------------------------------------------------------------------------------------------------------------------------------------------------------------------------------------------------------------------------------------------------------------------------------------------------------------------------------------------------------------|--|

|      |                                                                                                                                                                                                                                                                                                                                                                                                                                                                         |                                                                                                                                                                                                                              |                                                                                                                                                                                                                                                                                                                                                                                                                      |         |
|------|-------------------------------------------------------------------------------------------------------------------------------------------------------------------------------------------------------------------------------------------------------------------------------------------------------------------------------------------------------------------------------------------------------------------------------------------------------------------------|------------------------------------------------------------------------------------------------------------------------------------------------------------------------------------------------------------------------------|----------------------------------------------------------------------------------------------------------------------------------------------------------------------------------------------------------------------------------------------------------------------------------------------------------------------------------------------------------------------------------------------------------------------|---------|
|      | <p>totalRNA GSE148729<br/>down</p> <p>Untreated v SARS-CoV-2<br/>Calu-3 s1 4h polyA<br/>GSE148729 down</p> <p>Untreated v SARS-CoV-2<br/>IntestinalOrganoid 24h<br/>Expansion GSE149312 up</p> <p>Untreated v SARS-CoV-2<br/>IntestinalOrganoid 60h<br/>Expansion GSE149312 up</p>                                                                                                                                                                                      |                                                                                                                                                                                                                              |                                                                                                                                                                                                                                                                                                                                                                                                                      |         |
| OAS2 | <ol style="list-style-type: none"> <li>1. Healthy v SARS-CoV-2 lung GSE147507 up</li> <li>2. Mock v SARS-CoV-2 24h hiPSC-CMs GSE150392 up</li> <li>3. Mock v SARS-CoV-2 24h liver-organoid GSE151803 up</li> <li>4. Mock v SARS-CoV-2 A549 Series2 GSE147507 up</li> <li>5. Mock v SARS-CoV-2 Calu-3 24h totalRNA GSE148729 up</li> <li>6. Mock v SARS-CoV-2 Calu-3 s1 24h polyA GSE148729 up</li> <li>7. Mock v SARS-CoV-2 Calu-3 s2 12h polyA GSE148729 up</li> </ol> | <ol style="list-style-type: none"> <li>1. Type I interferon induction and signaling during SARS-CoV-2 infection WP4868</li> <li>2. Host-pathogen interaction of human coronaviruses - interferon induction WP4880</li> </ol> | <ol style="list-style-type: none"> <li>1. adenylyltransferase activity (GO:0070566)</li> <li>2. regulation of ribonuclease activity (GO:0060700)</li> <li>3. regulation of nuclease activity (GO:0032069)</li> <li>4. interleukin-27-mediated signaling pathway (GO:0070106)</li> <li>5. cellular response to type I interferon (GO:0071357)</li> <li>6. type I interferon signaling pathway (GO:0060337)</li> </ol> | Yes (3) |

|      |                                                                                                                                                                                                                                                                                                                                                                                                                                                |                                                                                                                                                     |                                                                                                                                                                       |         |
|------|------------------------------------------------------------------------------------------------------------------------------------------------------------------------------------------------------------------------------------------------------------------------------------------------------------------------------------------------------------------------------------------------------------------------------------------------|-----------------------------------------------------------------------------------------------------------------------------------------------------|-----------------------------------------------------------------------------------------------------------------------------------------------------------------------|---------|
|      | <p>8. Mock v SARS-CoV-2 Calu3 GSE147507 up</p> <p>9. Mock v SARS-CoV-2 Lung GSE150847 up</p> <p>10. Mock v SARS-CoV-2 NHBE GSE147507 up</p> <p>11. SARS-CoV-2 Mock v DMSO Organoids GSE154613 up</p> <p>12. Untreated v SARS-CoV-2 Calu-3 s1 4h polyA GSE148729 down</p> <p>13. Untreated v SARS-CoV-2 IntestinalOrganoid 60h Differentiation GSE149312 up</p> <p>14. Untreated v SARS-CoV-2 IntestinalOrganoid 60h Expansion GSE149312 up</p> |                                                                                                                                                     |                                                                                                                                                                       |         |
| OAS3 | <p>1. Healthy v SARS-CoV-2 lung GSE147507 up</p> <p>2. Mock v SARS-CoV-2 24h hiPSC-CMs GSE150392 up</p> <p>3. Mock v SARS-CoV-2 A549 Series2 GSE147507 up</p>                                                                                                                                                                                                                                                                                  | <p>1. Type I interferon induction and signaling during SARS-CoV-2 infection WP4868</p> <p>2. Host-pathogen interaction of human coronaviruses -</p> | <p>1. adenylyltransferase activity (GO:0070566)</p> <p>2. regulation of ribonuclease activity (GO:0060700)</p> <p>3. regulation of nuclease activity (GO:0032069)</p> | Yes (3) |

|       |                                                                                                                                                                                                                                                                                                                                                                                                                                                                            |                             |                                                                                                                                                                                                                                                                                                                                                                                                                                                                    |        |
|-------|----------------------------------------------------------------------------------------------------------------------------------------------------------------------------------------------------------------------------------------------------------------------------------------------------------------------------------------------------------------------------------------------------------------------------------------------------------------------------|-----------------------------|--------------------------------------------------------------------------------------------------------------------------------------------------------------------------------------------------------------------------------------------------------------------------------------------------------------------------------------------------------------------------------------------------------------------------------------------------------------------|--------|
|       | <p>4. Mock v SARS-CoV-2 Calu-3 24h totalRNA GSE148729 up</p> <p>5. Mock v SARS-CoV-2 Calu-3 s1 24h polyA GSE148729 up</p> <p>6. Mock v SARS-CoV-2 Calu-3 s2 12h polyA GSE148729 up</p> <p>7. Mock v SARS-CoV-2 Calu3 GSE147507 up</p> <p>8. Mock v SARS-CoV-2 Lung GSE150847 up</p> <p>9. Mock v SARS-CoV-2 NHBE GSE147507 up</p> <p>10. SARS-CoV-2 Mock v DMSO Organoids GSE154613 up</p> <p>11. Untreated v SARS-CoV-2 IntestinalOrganoid 60h Expansion GSE149312 up</p> | interferon induction WP4880 | <p>4. positive regulation of monocyte chemotactic protein-1 production (GO:0071639)</p> <p>5. cellular response to type I interferon (GO:0071357)</p> <p>6. type I interferon signaling pathway (GO:0060337)</p> <p>7. regulation of monocyte chemotactic protein-1 production (GO:0071637)</p> <p>8. regulation of chemokine (C-X-C motif) ligand 2 production (GO:2000341)</p> <p>9. regulation of type I interferon-mediated signaling pathway (GO:0060338)</p> |        |
| GRIK4 | Mock v SARS-CoV-2 Lung GSE150847 down                                                                                                                                                                                                                                                                                                                                                                                                                                      | NA                          | NA                                                                                                                                                                                                                                                                                                                                                                                                                                                                 | No (1) |
| FMO5  | 1. Mock v SARS-CoV-2 24h liver-organoid GSE151803 down                                                                                                                                                                                                                                                                                                                                                                                                                     | NA                          | NA                                                                                                                                                                                                                                                                                                                                                                                                                                                                 | No (1) |

|         |                                                                                                                                                                                                                                                                                                                                                   |    |    |        |
|---------|---------------------------------------------------------------------------------------------------------------------------------------------------------------------------------------------------------------------------------------------------------------------------------------------------------------------------------------------------|----|----|--------|
|         | <ul style="list-style-type: none"> <li>2. Mock v SARS-CoV-2 Lung GSE150847 down</li> <li>3. Mock v SARS-CoV-2 NHBE GSE147507 down</li> <li>4. Untreated v SARS-CoV-2 IntestinalOrganoid 24h Differentiation GSE149312 down</li> <li>5. Untreated v SARS-CoV-2 IntestinalOrganoid 60h Expansion GSE149312 down</li> </ul>                          |    |    |        |
| ST3GAL1 | <ul style="list-style-type: none"> <li>1. Mock v SARS-CoV-2 A549 Series5 GSE147507 up</li> <li>2. Mock v SARS-CoV-2 Calu-3 s1 4h polyA GSE148729 up</li> <li>3. Mock v SARS-CoV-2 Calu3 GSE147507 up</li> <li>4. Untreated v SARS-CoV-2 Caco2 4h polyA GSE148729 up</li> <li>5. Untreated v SARS-CoV-2 Calu-3 4h totalRNA GSE148729 up</li> </ul> | NA | NA | No (2) |

|        |                                                                                                                                                                                               |    |    |        |
|--------|-----------------------------------------------------------------------------------------------------------------------------------------------------------------------------------------------|----|----|--------|
|        | <p>6. Untreated v SARS-CoV-2 Calu-3 s1 4h polyA GSE148729 up</p> <p>7. Untreated v SARS-CoV-2 IntestinalOrganoid 60h Differentiation GSE149312 down</p>                                       |    |    |        |
| GAS7   | <p>1. Mock v SARS-CoV-2 Calu-3 s2 12h polyA GSE148729 down</p> <p>2. Mock v SARS-CoV-2 Lung GSE150847 down</p> <p>3. Untreated v SARS-CoV-2 IntestinalOrganoid 60h Expansion GSE149312 up</p> | NA | NA | No (1) |
| TRIM33 | <p>1. Mock v SARS-CoV-2 Caco2 4h polyA GSE148729 up</p> <p>2. Mock v SARS-CoV-2 Calu-3 s2 4h polyA GSE148729 up</p>                                                                           | NA | NA | No (1) |
| DPP9   | Untreated v SARS-CoV-2 IntestinalOrganoid 60h Differentiation GSE149312 up                                                                                                                    | NA | NA | No (1) |

|       |                                                                                                                                                                                                                                                                                                                                                                            |    |    |        |
|-------|----------------------------------------------------------------------------------------------------------------------------------------------------------------------------------------------------------------------------------------------------------------------------------------------------------------------------------------------------------------------------|----|----|--------|
| MAT2B | <ol style="list-style-type: none"> <li>1. Mock v SARS-CoV-2 Calu-3 4h totalRNA GSE148729 down</li> <li>2. Mock v SARS-CoV-2 Calu-3 s1 4h polyA GSE148729 down</li> <li>3. Mock v SARS-CoV-2 VeroE6 24h GSE153940 down</li> <li>4. Untreated v SARS-CoV-2 Calu-3 4h totalRNA GSE148729 down</li> <li>5. Untreated v SARS-CoV-2 Calu-3 s1 4h polyA GSE148729 down</li> </ol> | NA | NA | No (1) |
| ICAM4 | NA                                                                                                                                                                                                                                                                                                                                                                         | NA | NA | No (0) |
| OBP2B | NA                                                                                                                                                                                                                                                                                                                                                                         | NA | NA | No (0) |
| TRHR  | NA                                                                                                                                                                                                                                                                                                                                                                         | NA | NA | No (0) |
